# Supplementary material for: Chemical dual-site capture of NH3 by unprecedentedly low-viscosity deep eutectic solvents
Source: Royal Society of Chemistry journal article supplement (doi:10.1039/c9cc09043f), 2020-01-01
Supplement: c9cc09043f1.pdf [file c9cc09043f1.pdf]

## **ELECTRONIC SUPPLEMENTARY INFORMATION**

### **Chemically Dual-Site Capture of NH<sub>3</sub> by Unprecedentedly Low-Viscous Deep Eutectic Solvents**

Wen-Jing Jiang,<sup>a</sup> Fu-Yu Zhong,<sup>a</sup> Lin-Sen Zhou,<sup>b</sup> Hai-Long Peng,<sup>a</sup> Jie-Ping Fan<sup>a</sup> and Kuan Huang<sup>a\*</sup>

<sup>a</sup>Key Laboratory of Poyang Lake Environment and Resource Utilization of Ministry of Education, School of Resources Environmental and Chemical Engineering, Nanchang University, Nanchang, Jiangxi 330031, China.

<sup>b</sup>Institute of Materials, China Academy of Engineering Physics, Jianguo, Sichuan 621908, China.

\*Corresponding author: [huangk@ncu.edu.cn](mailto:huangk@ncu.edu.cn) (K. H.).

## EXPERIMENTAL

### Materials

NH<sub>3</sub> (99.99 mol%) and CO<sub>2</sub> (99.99 mol%) were supplied by Huasheng Co. Ltd., China. Ethylamine chloride (EaCl, 98 wt.%) and phenol (PhOH, 99 wt.%) were purchased from Adamas Co. Ltd., China. All the chemicals were used directly without further purification. To prepare EaCl+PhOH DESs, the mixtures of EaCl and PhOH were stirred at 333.2 K until they became transparent liquids. The prepared DESs are denoted as EaCl+PhOH (*a:b*), where *a:b* is the molar ratio of EaCl to PhOH.

### Characterizations

The water contents were measured by Karl-Fischer titration on a Titan TKF-1B analyzer with a relative uncertainty of 0.03. The densities were collected on an Anton Paar DMA 4500M densiometer with a standard uncertainty of 0.00005 g/cm<sup>3</sup>. The viscosities were collected on a Brookfield RVDV2PCP230 viscometer with a relative uncertainty of 0.01. The thermogravimetric analysis (TGA) was conducted on a Netzsch STA 2500 analyzer at a heating rate of 5 K/min under flowing N<sub>2</sub> atmosphere. The <sup>1</sup>H NMR spectra were collected on an Agilent 400MR DD2 spectrometer using d<sub>6</sub>-DMSO as the external solvent and TMS as standard.

### Gas absorption measurements

The apparatus for gas absorption measurements has been reported in our previous work, and its reliability has also been verified<sup>[1]</sup>. It has two stainless steel chambers: one is used as the storage chamber and the other as the absorption chamber. The absorption chamber is equipped with a magnetic stirrer, to minimize the barrier for gas

diffusion in liquid phase. The temperature of whole apparatus is adjusted by a water bath with a standard uncertainty of 0.1 K. The pressures of two chambers are monitored by two Wideplus-8 transducers with a standard uncertainty of 1.2 kPa.

To measure the gas absorption rates, a specific amount of liquid solvent ( $w_L$ , in g) was loaded in the absorption chamber. The amount of liquid solvent was accurately weighted by an analytic balance with a standard uncertainty of 0.0001 g. Then, the whole apparatus was completely evacuated, and the gas from cylinder was loaded in the storage chamber to a pressure of  $P_1$ . The needle valve connecting two chambers was turned on to introduce a specific amount of gas into the absorption chamber, the pressure of which increased to an initial value of  $P_2$ . The pressure of storage chamber thus decreased to a value of  $P_1'$ , and the absorption of gas in liquid solvent resulted in the decrease of  $P_2$ . The values of  $P_2$  were recorded online, and the amount of gas absorbed at any time ( $m_G$ , in mol/kg) was calculated by the following equation:

$$m_G = [\rho_g^{P_1, T} V_1 - \rho_g^{P_1', T} V_1 - \rho_g^{P_2, T} (V_2 - w_L / \rho_L)] / w_L \quad (1)$$

where  $\rho_g^{P, T}$  (in mol/cm<sup>3</sup>) is the density of gas at the pressure of  $P$  and temperature of  $T$ ;  $\rho_L$  (in g/cm<sup>3</sup>) is the density of liquid solvent;  $V_1$  and  $V_2$  (in cm<sup>3</sup>) are the volumes of storage and absorption chambers respectively. The values of  $\rho_g^{P, T}$  were acquired from the NIST Chemistry WebBook<sup>[2]</sup>. The values of  $\rho_L$  were experimentally measured in this work. The values of  $V_1$  and  $V_2$  were also experimentally measured in this work by using helium as the probing gas. The gas absorption rates were evaluated by plotting the amounts of gas absorbed versus the absorption time.

To measure the gas absorption capacities, the absorption of gas in solvent was allowed to proceed till equilibrium. When the values of  $P_2$  remained unchanged for 1 h, the absorption of gas was considered to reach equilibrium. The amounts of gas absorbed at equilibrium condition were used as the gas absorption capacities. The capacities of gas absorption at elevated pressures were obtained by introducing more gas into the absorption chamber. The standard uncertainties of gas absorption capacities were estimated from the standard uncertainties of pressures through error propagation, since the respective contributions of the uncertainties of temperatures, volumes, mass and densities to the uncertainties of gas absorption capacities can be ignored<sup>[1]</sup>.

### **Molecular dynamics simulations**

The molecular dynamics (MD) simulations were conducted based on the density functional theory (DFT) as implemented in open-source CP2K/QUICKSTEP code<sup>[3-4]</sup>. The BLYP method<sup>[5-6]</sup> at the level of triple-zeta valence polarization basis set<sup>[7]</sup> with Goedecker–Teter–Hutter (GTH) pseudopotentials<sup>[8-9]</sup> were used. The plane-wave energy cutoff was set to 400 Ry, and the dispersion interaction was included by the D3 method (BLYP-D3) developed by Grimme et al.<sup>[10]</sup>. A  $12 \times 12 \times 12$  Å cubic box containing 3 EaCl, 6 PhOH and 3 NH<sub>3</sub> molecules was constructed for MD simulations. The MD simulations were conducted with canonical (NVT) ensemble employing Nosé–Hoover chain thermostats with a time step of 1 fs at a finite temperature of 300 K. After the initial structure being optimized to local minimum, the first 20 ps data of MD runs were discarded to ensure the equilibrium of system, and the radial distribution

functions (RDFs) were calculated during the following production cycles of at least 70 ps.

### **Quantum chemistry calculations**

The quantum chemistry calculations were carried out using the Gaussian 09 program<sup>[11]</sup>. All the geometries were fully optimized by the B3LYP method based on the DFT at the level of 6-31G++(d,p) basis set<sup>[12-13]</sup>. To incorporate a condensed polar environment to DESs, a polarizable continuum model (PCM)<sup>[14]</sup> with DMSO as the solvent was used. The frequency calculations were also conducted to verify the true minima of optimized geometries. For each structure, different geometries were screened to determine the most stable geometry. The calculated energies were finally corrected by zero-point energies (ZPEs).

Table S1. Water contents of DESs prepared in this work<sup>a</sup>

| DESs            | $w_{\text{H}_2\text{O}}$ |
|-----------------|--------------------------|
| EaCl+PhOH (1:2) | 0.0037±0.0001            |
| EaCl+PhOH (1:3) | 0.0052±0.0002            |
| EaCl+PhOH (1:5) | 0.0046±0.0001            |
| EaCl+PhOH (1:7) | 0.0067±0.0002            |

<sup>a</sup> $w_{\text{H}_2\text{O}}$  is the mass fraction of water in DESs.

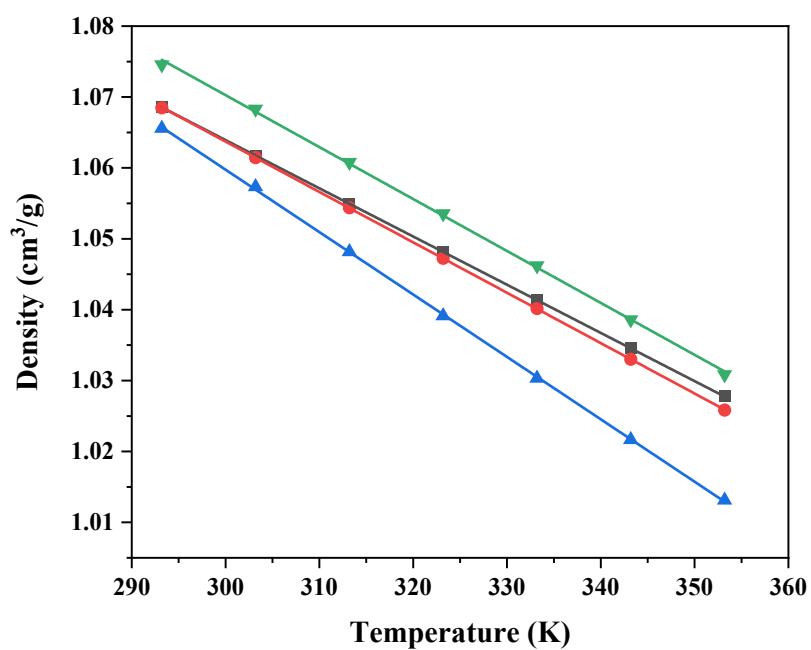

Fig. S1 Densities of EaCl+PhOH DESs [■: EaCl+PhOH (1:2), ●: EaCl+PhOH (1:3), ▲: EaCl+PhOH (1:5), ▼: EaCl+PhOH (1:7)].

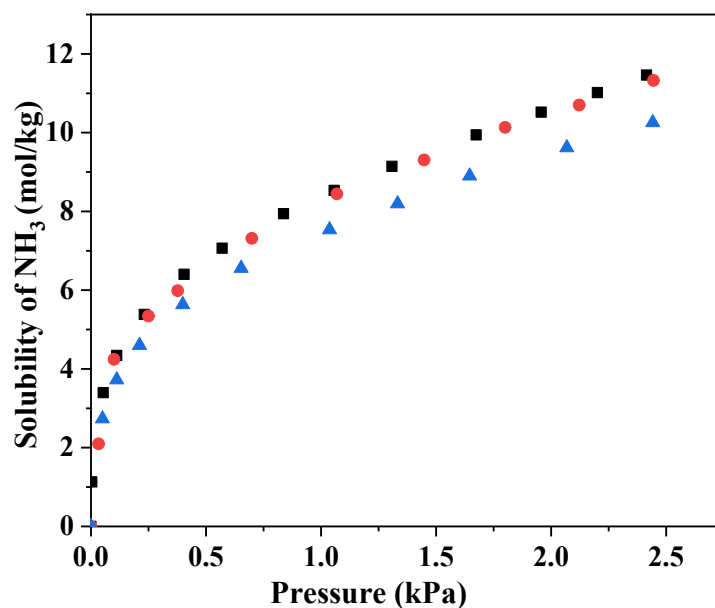

Fig. S2 Capacities of  $\text{NH}_3$  absorption in  $\text{EaCl}+\text{PhOH}$  (1:7) with different water contents at 313.2 K (■:  $w_{\text{H}_2\text{O}}=0.0067$ , ●:  $w_{\text{H}_2\text{O}}=0.0010$ , ▲:  $w_{\text{H}_2\text{O}}=0.0455$ ).

To address the concern about water effect on  $\text{NH}_3$  absorption, two samples of  $\text{EaCl}+\text{PhOH}$  (1:7) were further prepared: one was dried at 333.3 K and 0.1 kPa for 24 h, and the mass fraction of water was measured to be 0.0010; another was prepared by adding some water, and the mass fraction of water was measured to be 0.0455. The samples are denoted as  $\text{EaCl}+\text{PhOH}$  (1:7)- $x$ , where  $x$  is the mass fraction of water. The  $\text{NH}_3$  capacities of three  $\text{EaCl}+\text{PhOH}$  (1:7) samples were measured (see Fig. S2), and it is found that the  $\text{NH}_3$  capacities of  $\text{EaCl}+\text{PhOH}$  (1:7)-0.0067 and  $\text{EaCl}+\text{PhOH}$  (1:7)-0.0010 are almost the same, and the  $\text{NH}_3$  capacities of  $\text{EaCl}+\text{PhOH}$  (1:7)-0.0455 are only slightly lower than those of  $\text{EaCl}+\text{PhOH}$  (1:7)-0.0067.



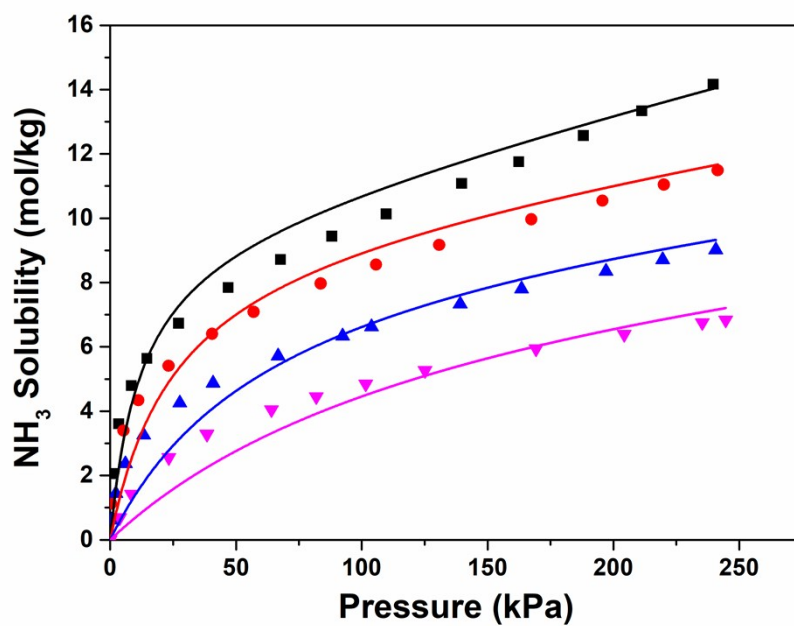

Fig. S3 Capacities of NH<sub>3</sub> absorption in EaCl+PhOH (1:7) at different temperatures (■: 298.2 K, ●: 313.2 K, ▲: 333.2 K, ▼: 353.2 K, lines: fitting results).

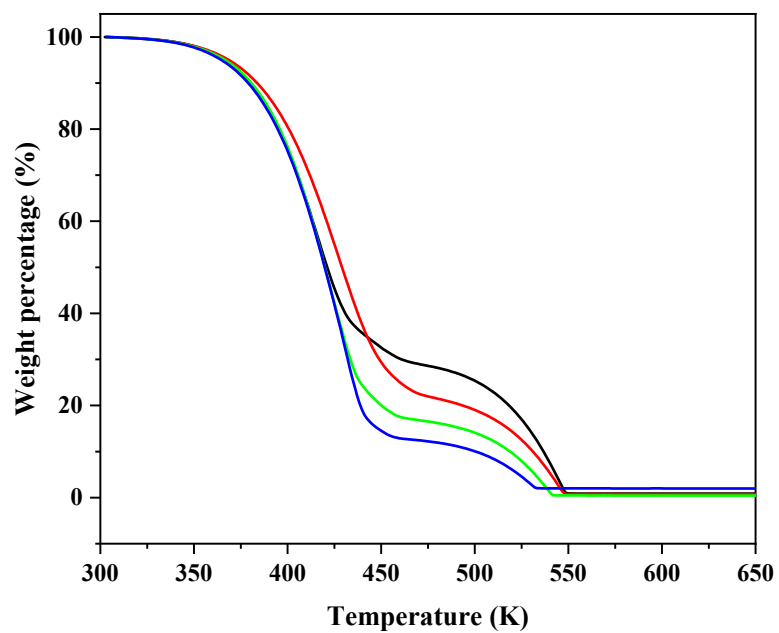

Fig. S4 TGA curves for EaCl+PhOH DESs. [black: EaCl+PhOH (1:2), red: EaCl+ PhOH (1:3), green: EaCl+ PhOH (1:5), blue: EaCl+ PhOH (1:7)]

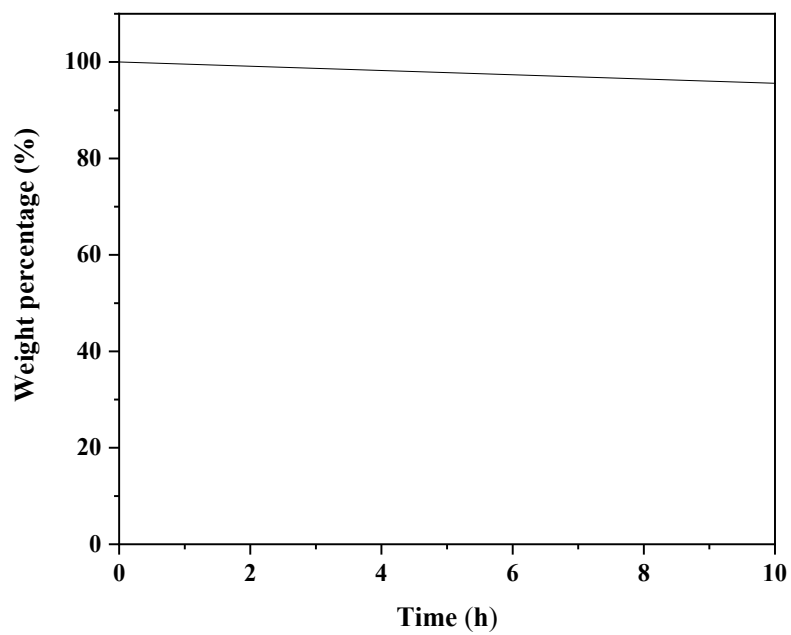

Fig. S5 Weight change of EaCl+PhOH (1:7) under N<sub>2</sub> purge at 333.2 K.

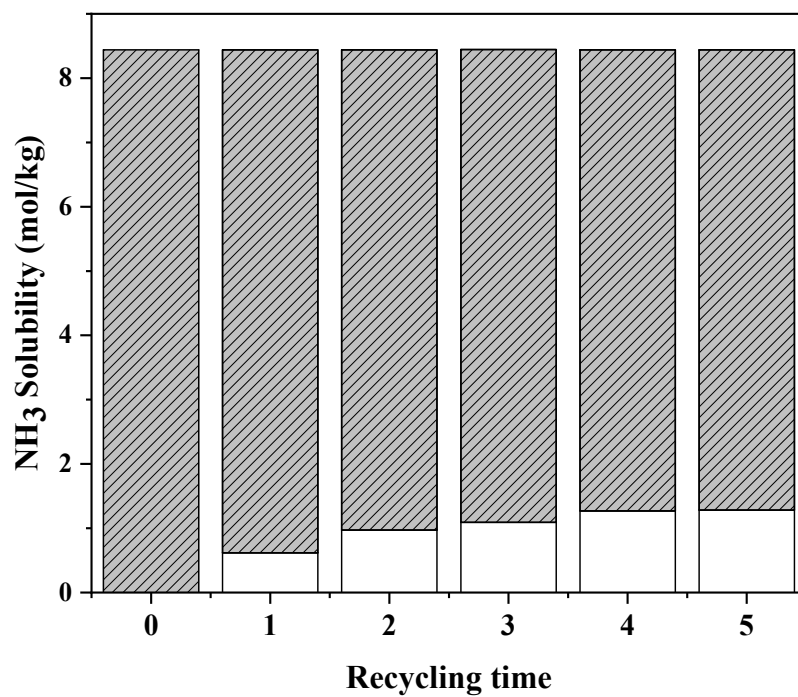

Fig. S6 Recycling of EaCl+PhOH (1:7) for NH<sub>3</sub> absorption (absorption condition: 313.2 K and ~100 kPa, desorption condition: 333.2 K and ~0.1 kPa).

Table S2. Comparison for NH<sub>3</sub> capacities of different DESs and ILs

| Solvent                                     | <i>T</i> (K) | <i>P</i> (kPa) | <i>m</i> <sub>NH<sub>3</sub></sub> (mol/kg) | Refs.     |
|---------------------------------------------|--------------|----------------|---------------------------------------------|-----------|
| EaCl+PhOH (1:2)                             | 313.2        | 101.3          | 7.023                                       | This work |
|                                             |              | 10.0           | 3.443                                       |           |
| EaCl+PhOH (1:3)                             | 313.2        | 101.3          | 7.433                                       | This work |
|                                             |              | 10.0           | 3.709                                       |           |
| EaCl+PhOH (1:5)                             | 313.2        | 101.3          | 8.106                                       | This work |
|                                             |              | 10.0           | 3.881                                       |           |
| EaCl+PhOH (1:7)                             | 298.2        | 101.3          | 9.801                                       | This work |
|                                             |              | 10.0           | 4.991                                       |           |
| ChCl+Res+Gly (1:3:5)                        | 298.2        | 101.3          | 9.982                                       | [22]      |
| ChCl+PhOH+EG (1:5:4)                        | 298.2        | 101.3          | 9.619                                       | [24]      |
|                                             |              | 10.0           | 2.630                                       |           |
| NH <sub>4</sub> SCN+Gly (2:3)               | 313.2        | 101.3          | 10.353                                      | [23]      |
|                                             |              | 10.0           | 2.391                                       |           |
| EaCl+Gly (1:2)                              | 298.2        | 101.3          | 9.342                                       | [25]      |
|                                             |              | 10.0           | 1.588                                       |           |
| EaCl+AA (1:1)                               | 313.2        | 101.3          | 3.998                                       | [26]      |
|                                             |              | 10.0           | 0.627                                       |           |
| EaCl+urea (1:1)                             | 313.2        | 101.3          | 4.521                                       | [27]      |
|                                             |              | 10.0           | 0.609                                       |           |
| ChCl+TetrZ+EG (3:7:14)                      | 298.2        | 101.3          | 13.687                                      | [28]      |
|                                             |              | 10.0           | 6.786                                       |           |
| [Bmim][BF <sub>4</sub> ]                    | 298.2        | 101.3          | 0.998                                       | [10]      |
| [Bmim][PF <sub>6</sub> ]                    | 298.2        | 101.3          | 1.233                                       | [10]      |
| [Bmim][Tf <sub>2</sub> N]                   | 299.4        | 101.3          | 0.311                                       | [10]      |
| [Bmmim][DCA]                                | 303.0        | 101.3          | 1.139                                       | [38]      |
| [Emim][Ac]                                  | 298.3        | 101.3          | 1.879                                       | [11]      |
| [Hmim][Cl]                                  | 297.8        | 101.3          | 1.409                                       | [10]      |
| [EtOHmim][BF <sub>4</sub> ]                 | 313.2        | 101.3          | 2.642                                       | [12]      |
| [TMGH][BF <sub>4</sub> ]                    | 293.2        | 101.3          | 5.285                                       | [39]      |
| [DMEA][Ac]                                  | 298.1        | 101.3          | 5.872                                       | [11]      |
| [Bim][Tf <sub>2</sub> N]                    | 313.2        | 101.3          | 6.903                                       | [15]      |
|                                             |              | 10.0           | 1.297                                       |           |
| [Bim][SCN]                                  | 303.0        | 101.3          | 13.633                                      | [38]      |
|                                             |              | 10.0           | 2.12                                        |           |
| [Bim][NO <sub>3</sub> ]                     | 303.0        | 101.3          | 8.465                                       | [38]      |
| [Mim][Tf <sub>2</sub> N]                    | 313.2        | 101.3          | 7.508                                       | [38]      |
|                                             |              | 101.3          | 3.079                                       |           |
| [Emim] <sub>2</sub> [Co(NCS) <sub>4</sub> ] | 303.2        | 101.3          | 10.726                                      | [18]      |
|                                             |              | 10.0           | 3.059                                       |           |
| [Bmim] <sub>2</sub> [SnCl <sub>4</sub> ]    | 303.2        | 101.3          | 6.435                                       | [19]      |
|                                             |              | 10.0           | 1.149                                       |           |

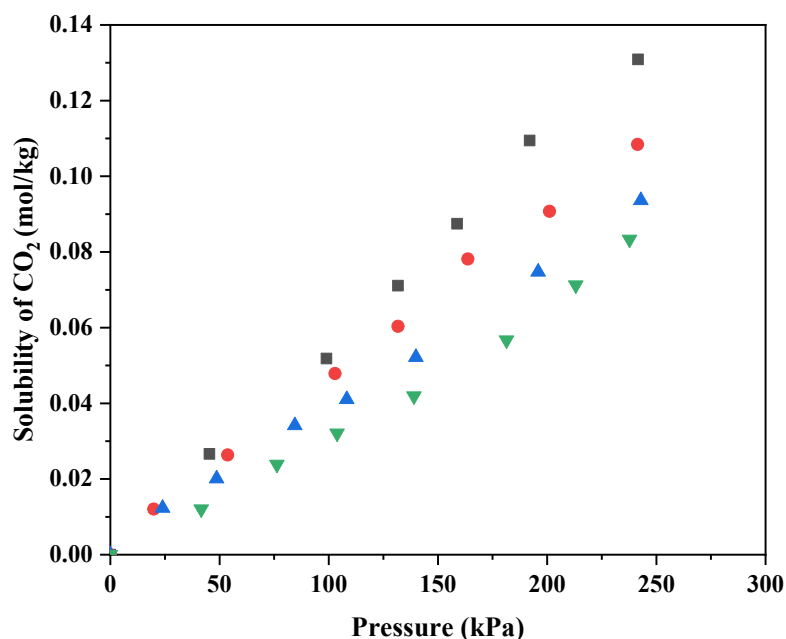

Fig. S7 Capacities of CO<sub>2</sub> absorption in EaCl+PhOH (1:7) at different temperatures (■: 298.2 K, ●: 313.2 K, ▲: 333.2 K, ▼: 353.2 K).

In the industrial streams, there is usually CO<sub>2</sub> coexisting with NH<sub>3</sub>. Therefore, the ability of liquid solvents for the selective absorption of NH<sub>3</sub> from CO<sub>2</sub> is very important. To this end, the capacities of CO<sub>2</sub> absorption in EaCl+PhOH (1:7) at different temperatures were also measured (see Fig. S7). It is found that the CO<sub>2</sub> capacities of EaCl+PhOH (1:7) are in the range of 0.032~0.052 mol/kg at 298.2~353.2 K and 100.0 kPa, being two magnitudes lower than the NH<sub>3</sub> capacities. The ideal NH<sub>3</sub>/CO<sub>2</sub> selectivities (defined as the ratio of NH<sub>3</sub> solubility to CO<sub>2</sub> solubility at 100.0 kPa) were calculated to be 151~195 at 298.2~353.2 K, suggesting the excellent ability of EaCl+PhOH DESs for the selective absorption of NH<sub>3</sub> from CO<sub>2</sub>.

## Thermodynamic calculations

Based on the experimental results, it is assumed that there are three changes for the absorption of  $\text{NH}_3$  in  $\text{EaCl}+\text{PhOH}$  DESs: (1)  $\text{NH}_3$  transfers from the gas phase to liquid phase; (2)  $\text{EaCl}$  reacts with  $\text{NH}_3$  to form  $\text{EaCl-NH}_3$  complex; (3)  $\text{PhOH}$  reacts with  $\text{NH}_3$  to form the  $\text{PhOH-NH}_3$  complex. The three changes can be depicted by the following expressions:

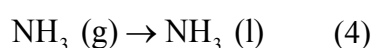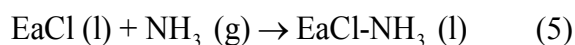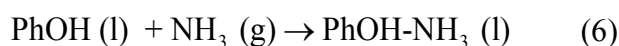

The first change is actually a physical absorption process, and can be depicted by the Henry's law equation:

$$H_{\text{NH}_3} = \frac{P_{\text{NH}_3}}{m_{\text{NH}_3}} \quad (7)$$

where  $H_{\text{NH}_3}$  is the Henry's constant of  $\text{NH}_3$  in liquid phase;  $P_{\text{NH}_3}$  is the pressure of  $\text{NH}_3$  in gas phase;  $m_{\text{NH}_3}$  is the molality of free  $\text{NH}_3$  in liquid phase. The second and third changes are actually chemical reaction processes, and can be depicted by the reaction equilibrium equations:

$$K_{\text{EaCl}} = \frac{m_{\text{EaCl-NH}_3}}{m_{\text{EaCl}} \cdot P_{\text{NH}_3}} \quad (8)$$

$$K_{\text{PhOH}} = \frac{m_{\text{PhOH-NH}_3}}{m_{\text{PhOH}} \cdot P_{\text{NH}_3}} \quad (9)$$

where  $K_{\text{EaCl}}$  and  $K_{\text{PhOH}}$  are the equilibrium constants for chemical reaction of  $\text{EaCl}$  with  $\text{NH}_3$  and chemical reaction of  $\text{PhOH}$  with  $\text{NH}_3$  respectively;  $m_{\text{EaCl-NH}_3}$ ,  $m_{\text{EaCl}}$ ,  $m_{\text{PhOH-NH}_3}$  and  $m_{\text{PhOH}}$  are the molalities of  $\text{EaCl-NH}_3$  complex, free  $\text{EaCl}$ ,  $\text{PhOH-NH}_3$

complex and free PhOH in liquid phase respectively. The mass balance equation for NH<sub>3</sub> is:

$$m_{\text{NH}_3}^t = m_{\text{NH}_3} + m_{\text{EaCl-NH}_3} + m_{\text{PhOH-NH}_3} \quad (10)$$

where  $m_{\text{NH}_3}^t$  is the total capacity of NH<sub>3</sub> absorption in DESs. The mass balance equation for EaCl and PhOH are:

$$m_{\text{EaCl}}^0 = m_{\text{EaCl}} + m_{\text{EaCl-NH}_3} \quad (11)$$

$$m_{\text{PhOH}}^0 = m_{\text{PhOH}} + m_{\text{PhOH-NH}_3} \quad (12)$$

where  $m_{\text{EaCl}}^0$  and  $m_{\text{PhOH}}^0$  are the initial molalities of EaCl and PhOH in DESs. Based on equations 7~12, the following equations can be derived:

$$m_{\text{NH}_3} = \frac{P_{\text{NH}_3}}{H_{\text{NH}_3}} \quad (13)$$

$$m_{\text{EaCl-NH}_3} = \frac{K_{\text{EaCl}} \cdot P_{\text{NH}_3} \cdot m_{\text{EaCl}}^0}{K_{\text{EaCl}} \cdot P_{\text{NH}_3} + 1} \quad (14)$$

$$m_{\text{PhOH-NH}_3} = \frac{K_{\text{PhOH}} \cdot P_{\text{NH}_3} \cdot m_{\text{PhOH}}^0}{K_{\text{PhOH}} \cdot P_{\text{NH}_3} + 1} \quad (15)$$

$$m_{\text{NH}_3}^t = \frac{P_{\text{NH}_3}}{H_{\text{NH}_3}} + \frac{K_{\text{EaCl}} \cdot P_{\text{NH}_3} \cdot m_{\text{EaCl}}^0}{K_{\text{EaCl}} \cdot P_{\text{NH}_3} + 1} + \frac{K_{\text{PhOH}} \cdot P_{\text{NH}_3} \cdot m_{\text{PhOH}}^0}{K_{\text{PhOH}} \cdot P_{\text{NH}_3} + 1} \quad (16)$$

Equation 13 gives the amount of NH<sub>3</sub> physically absorbed in liquid phase. Equation 14 gives the amount of NH<sub>3</sub> chemically reacting with EaCl. Equation 15 gives the amount of NH<sub>3</sub> chemically reacting with PhOH. Equation 16 gives the total capacity of NH<sub>3</sub> absorption in DESs, and is called the dual-site reaction equilibrium thermodynamic model (DS-RETM) equation.



With the Henry's constants and reaction equilibrium constants at different temperatures, the enthalpy changes for NH<sub>3</sub> absorption in EaCl+PhOH (1:7) can be calculated using the following equations through drawing linear fits:

$$\Delta H_{\text{phys}} = R \frac{\partial \ln H_{\text{NH}_3}}{\partial(1/T)} \quad (17)$$

$$\Delta H_{\text{EaCl}} = -R \frac{\partial \ln K_{\text{EaCl}}}{\partial(1/T)} \quad (18)$$

$$\Delta H_{\text{PhOH}} = -R \frac{\partial \ln K_{\text{PhOH}}}{\partial(1/T)} \quad (19)$$

where  $\Delta H_{\text{phys}}$  is the enthalpy change for physical absorption of NH<sub>3</sub> in EaCl+PhOH (1:7);  $\Delta H_{\text{EaCl}}$  and  $\Delta H_{\text{PhOH}}$  are the enthalpy changes for chemical reaction of EaCl with NH<sub>3</sub> and chemical reaction of PhOH with NH<sub>3</sub> respectively;  $R$  is the gas constant (8.314 J/mol·K). Figs. S8 and S9 show the linear fits for  $\ln H_{\text{NH}_3}$ ,  $\ln K_{\text{EaCl}}$  and  $\ln K_{\text{PhOH}}$  to  $1/T$ .

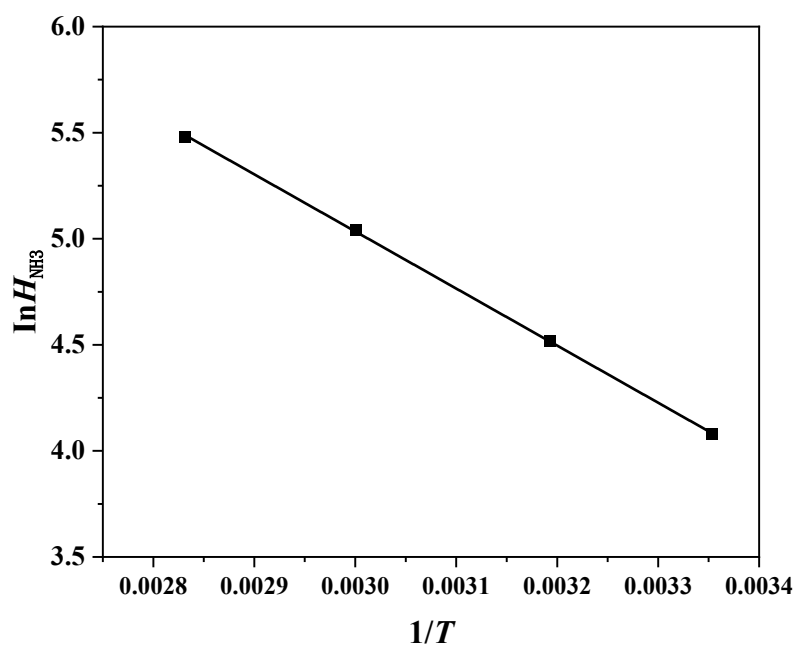

Fig. S8. Linear fits for  $\ln H_{\text{NH}_3}$  to  $1/T$ .

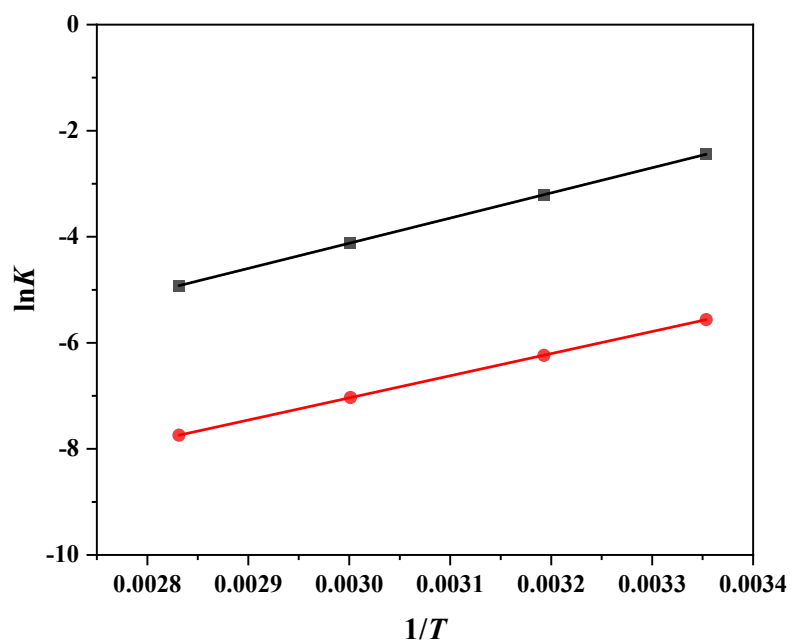

Fig. S9 Linear fits for  $\ln K_{\text{PhOH}}$  and  $\ln K_{\text{EaCl}}$  to  $1/T$  (■:  $\ln K_{\text{PhOH}}$ , ●:  $\ln K_{\text{EaCl}}$ ).

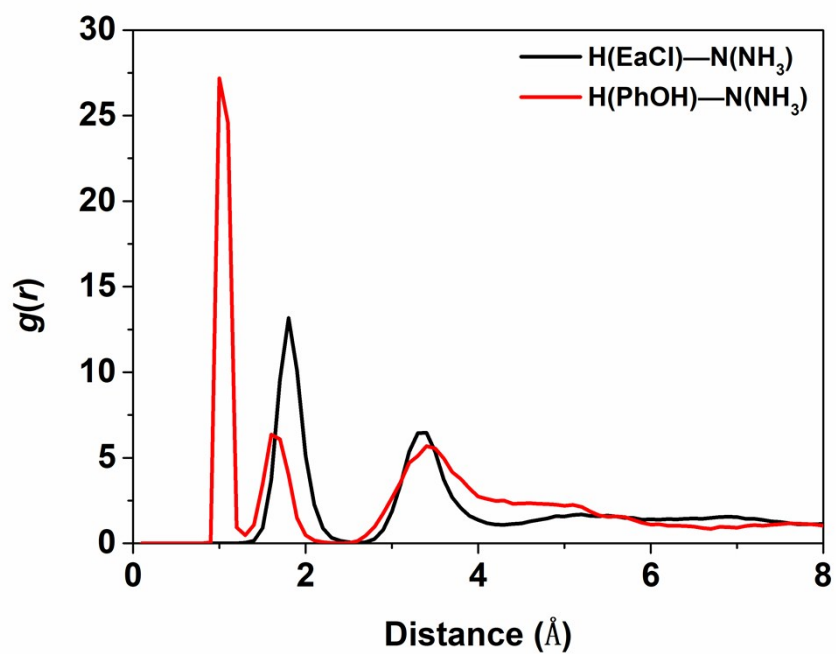

Fig. S10 Atom-atom RDFs of EaCl+PhOH+NH<sub>3</sub> system.

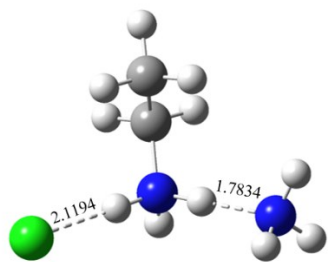

**EaCl+NH<sub>3</sub> ( $\Delta H=-45.0$  kJ/mol)**

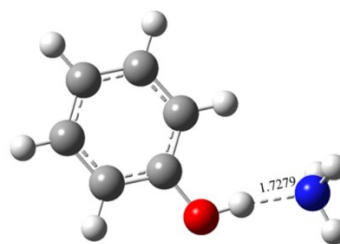

**PhOH+NH<sub>3</sub> ( $\Delta H=-46.6$  kJ/mol)**

Fig. S11 Optimized structures for EaCl+NH<sub>3</sub> and PhOH+NH<sub>3</sub> systems.

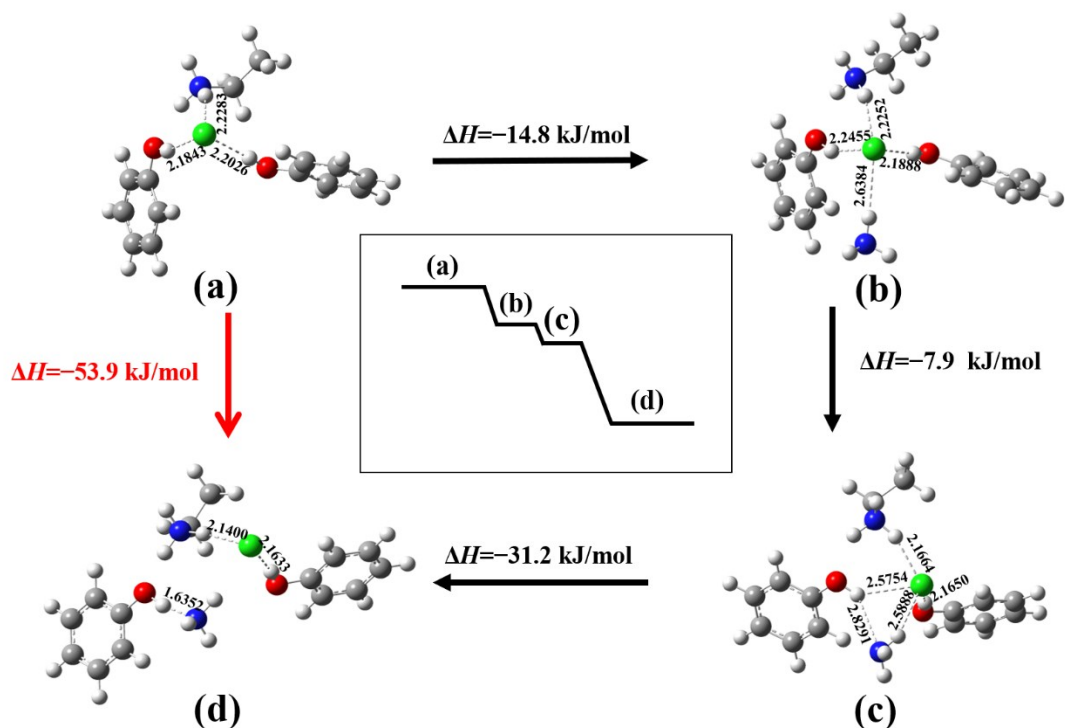

Fig. S12 Change route for interaction between acidic proton of PhOH and basic nitrogen of  $\text{NH}_3$  in  $\text{EaCl}+2\text{PhOH}+\text{NH}_3$  system.

In the first step, the active proton of  $\text{NH}_3$  attaches to the chloride of  $\text{EaCl}$  to form a hydrogen bond. In the second step, the basic nitrogen of  $\text{NH}_3$  then attaches to the acidic proton of  $\text{PhOH}$  form an intermediate geometry. In the third step, the intermolecular hydrogen bond between chloride of  $\text{EaCl}$  and acidic proton of  $\text{PhOH}$  is broken to form the most stable geometry. The enthalpy changes for three steps are  $-14.8$ ,  $-7.9$  and  $-31.2$  kJ/mol respectively, suggesting that all the three steps are thermodynamically favorable.

## References

1. F. Y. Zhong, K. Huang and H. L. Peng, *J. Chem. Thermodyn.*, 2019, **129**, 5-11.
2. E. W. Lemmon, M. O. McLinden and D. G. Friend, *NIST ChemistryWebBook, NIST Standard Reference Database Number 69*, 2018, National Institute of Standards and Technology.
3. J. VandeVondele, M. Krack, F. Mohamed, M. Parrinello, T. Chassaing and J. Hutter, *Comput. Phys. Commun.*, 2005, **167**, 103-128.
4. J. Hutter, M. Iannuzzi, F. Schiffmann and J. VandeVondele, *WIREs Comput. Mol. Sci.*, 2014, **4**, 15-25.
5. A. Becke, *Phys. Rev. A*, 1988, **38**, 3098-3100.
6. C. Lee, W. Yang and R. G. Parr, *Phys Rev B: Condens Matter*, 1988, **37**, 785-789.
7. J. VandeVondele and J. Hutter, *J. Chem. Phys.*, 2007, **127**, 114105.
8. C. Hartwigsen, S. Goedecker and J. Hutter, *Phys. Rev. B*, 1998, **58**, 3641-3662.
9. S. Goedecker, M. Teter and J. Hutter, *Phys Rev B Condens Matter*, 1996, **54**, 1703-1710.
10. S. Grimme, J. Antony, S. Ehrlich and H. Krieg, *J. Chem. Phys.*, 2010, **132**, 154104.
11. Frisch MJ, Trucks GW, Schlegel HB, et al. *Gaussian 09*. Gaussian, Wallingford, CT, USA, 2009.
12. A. D. Becke, *J. Chem. Phys.* 1993, **98**, 5648-5652.
13. P. J. Stephens, F. J. Devlin, C. F. Chabalowski and M. J. Frisch, *J. Phys. Chem.*, 1994, **45**, 11623-11627.
14. M. Cossi, V. Barone, R. Cammi and J. Tomasi, *Chem. Phys. Lett.*, 1996, **255**, 327-335.
